# Supplementary material for: Metabolomics of IgE-Mediated Food Allergy and Oral Immunotherapy Outcomes based on Metabolomic Profiling
Source: bioRxiv or medRxiv preprint supplement (doi:10.1101/2024.05.31.24308233), 2024-06-01
Supplement: Supplementary file [file media-1.pdf]

**Figure E1 – PNOIT: Metabolites associated with time on OIT.** Generalized linear model of metabolites significantly changing over time on OIT (increasing in purple and decreasing in green) adjusted for age, with (A) all significant metabolites, and (B) all identified metabolites in the key pathways of interest (bile acids, histidine metabolites, sphingolipids, eicosanoid & linoleic acid metabolites).

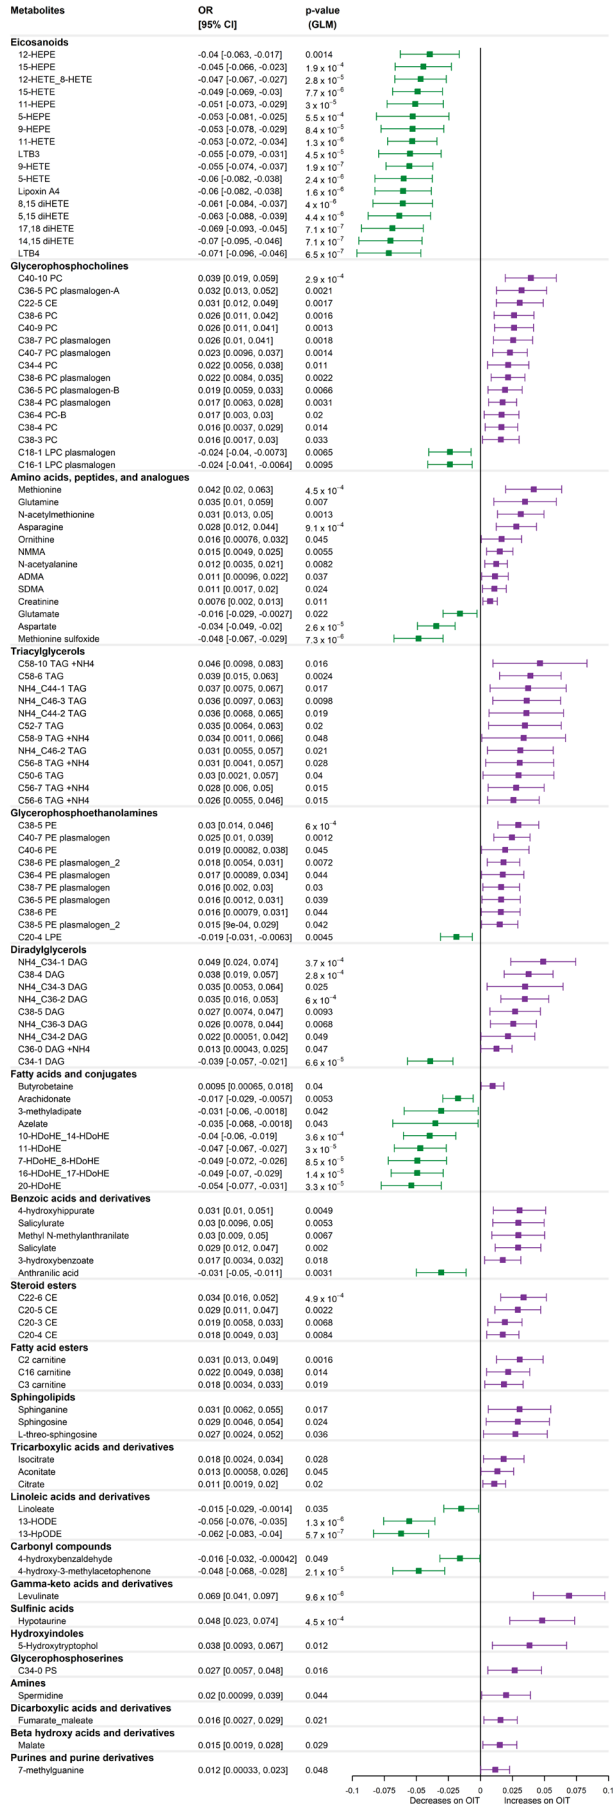

A.

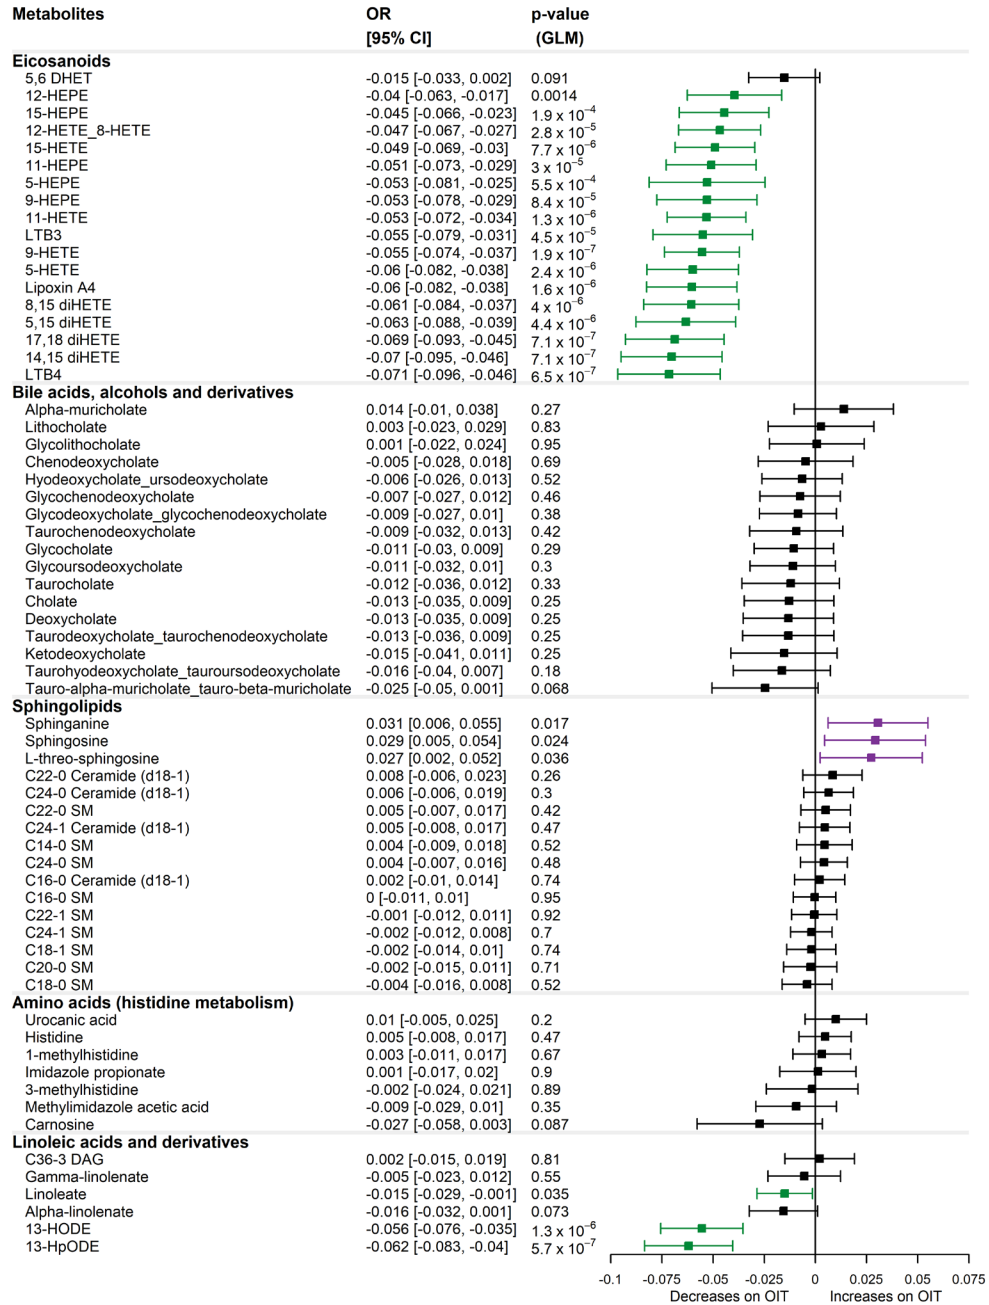

**B.**

**Supplemental Figure E2 – PNOIT: Metabolites associated with OIT outcome.** Generalized linear model of metabolites significantly associated OIT outcome (higher in SU in blue, higher in TD in red) adjusted for age and time on OIT, with (A) all significant metabolites, and (B) all identified metabolites in the key pathways of interest (bile acids, histidine metabolites, sphingolipids, eicosanoid & linoleic acid metabolites).

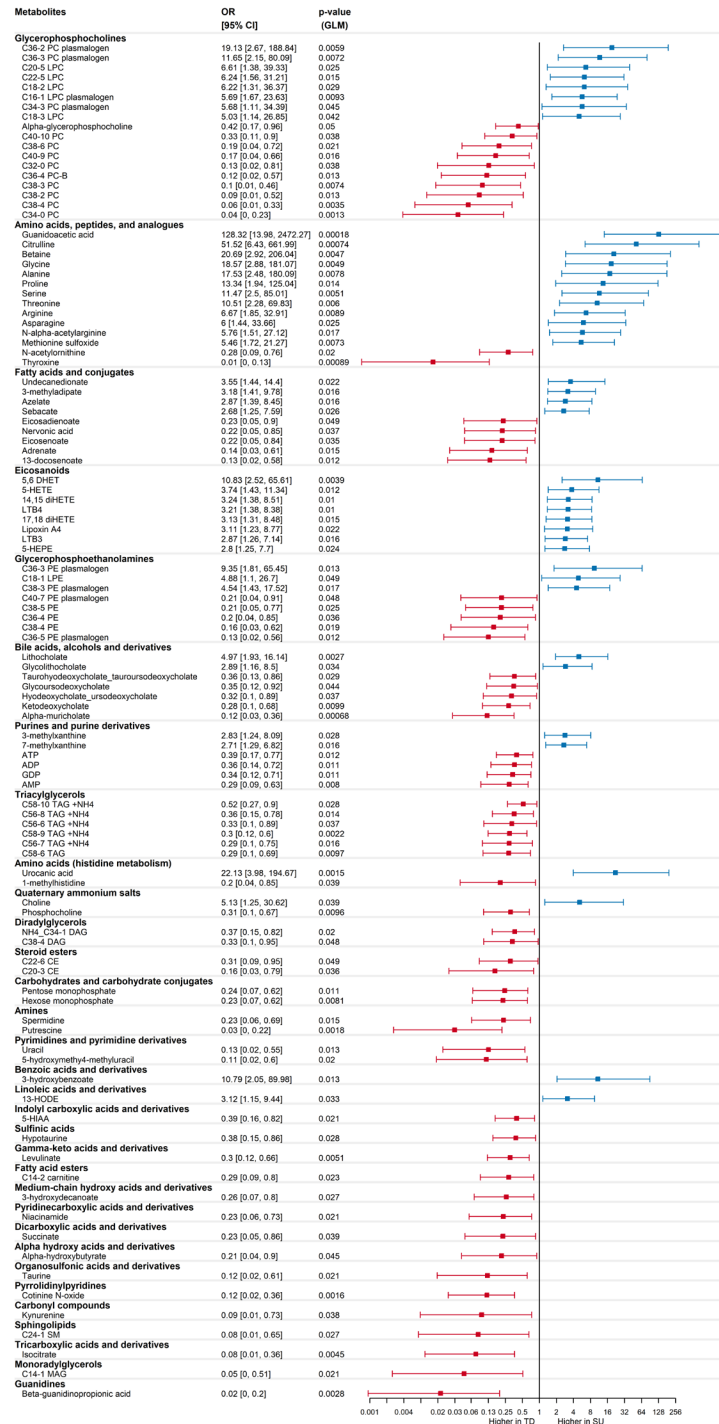

A.

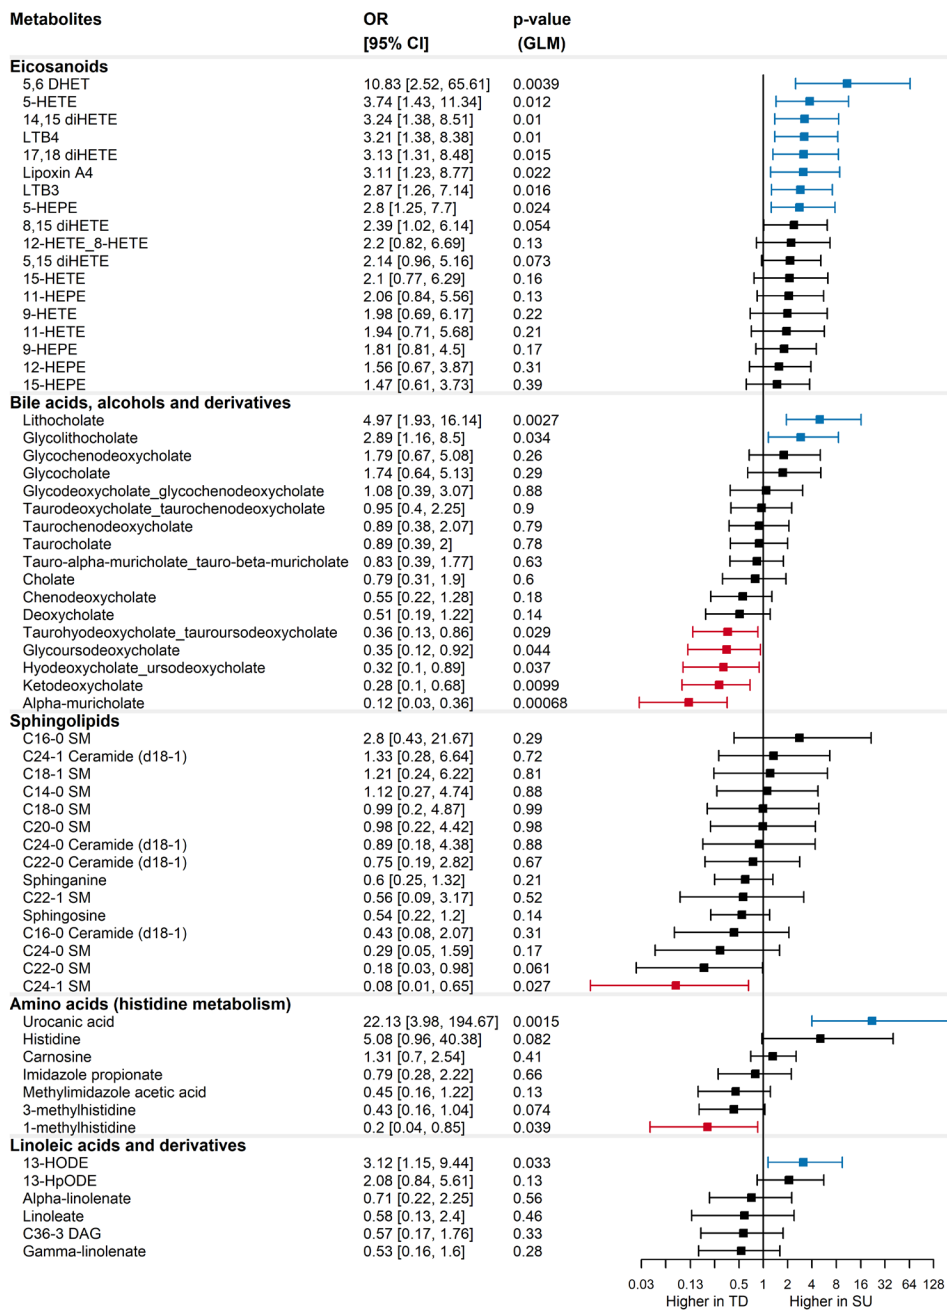

B.

**Supplemental Table E1: PNOIT: Biological pathways associated with time on OIT matched to metabolites of interest.**

| <b>Pathway Name</b>                                   | <b>Pathway Source/Pathway ID</b> | <b>p-value (FDR adj) (% Matched Analytes)</b> | <b>Matched Analytes</b>                                                                                                                                                             |
|-------------------------------------------------------|----------------------------------|-----------------------------------------------|-------------------------------------------------------------------------------------------------------------------------------------------------------------------------------------|
| Metabolism of alpha-linolenic acid                    | wiki   WP4586                    | 0.000011 (35%)                                | Leinolic acid; Linoleic acid; all-cis-5,8,11,14-Eicosatetraenoic acid; Arachidonic acid;15-HETE; FA 20:4;O;5S,6R-LipoxinA4; Lipoxin A4;12-HEPE; FA 20:5;O;15-HEPE; FA 20:5;O;5-HETE |
| Eicosanoid synthesis                                  | wiki   WP167                     | 0.02 (15%)                                    | all-cis-5,8,11,14-Eicosatetraenoic acid; Arachidonic acid;15-HETE; FA 20:4;O;11(R)-HETE;5-HETE                                                                                      |
| Transport of inorganic cations/anions and amino acids | wiki   WP1936                    | 0.00016 (15%)                                 | Glutamate; L-Glutamic acid;(S)-malate; Malic acid;L-Asparagine;L-Aspartic acid;ornithine;Glutamine; L-Glutamine;L-Methionine; Methionine;L-Targinine; methylArg                     |
| Sphingolipid metabolism in senescence                 | wiki   WP5121                    | 0.025 (21%)                                   | Sphingosine;D-erythro-2-Amino-1,3-octadecanediol; Sphinganine;DG(16:0_16:0); DG(18:0/20:4(5Z,8Z,11Z,14Z)/0:0)                                                                       |
| Alanine and aspartate metabolism                      | wiki   WP106                     | 0.0001 (29%)                                  | Citric acid;fumarate; Fumaric acid;(S)-malate; Malic acid;L-Asparagine;L-Aspartic acid;L-Acetylcarnitine; O-Acetylcarnitine                                                         |
| Eicosanoid metabolism via lipoxygenases (LOX)         | wiki   WP4721                    | 0.00072 (19%)                                 | all-cis-5,8,11,14-Eicosatetraenoic acid; Arachidonic acid;15-HETE; FA 20:4;O;5S,6R-LipoxinA4; Lipoxin A4;8-HETE;12(S)-Leukotriene B4; 6t,12epi-LTB4;5-HETE                          |

|                                                |               |                |                                                                                                                                                                                                                                                                                                                                                                                                                                                                                                                                    |
|------------------------------------------------|---------------|----------------|------------------------------------------------------------------------------------------------------------------------------------------------------------------------------------------------------------------------------------------------------------------------------------------------------------------------------------------------------------------------------------------------------------------------------------------------------------------------------------------------------------------------------------|
| Metabolism overview                            | wiki   WP3602 | 0.00091 (9%)   | Citric acid;fumarate; Fumaric acid;Glutamate; L-Glutamic acid;(S)-malate; Malic acid;L-Aspartic acid;D-threo-Isocitrate; Isocitric acid;Ornithine;L-Palmitoylcarnitine; L-PCARN; Palmitoylcarnitine;Glutamine; L-Glutamine; TG(16:0/20:4(5Z,8Z,11Z,14Z)/20:4(5Z,8Z,11Z,14Z)); TG(18:1(9Z)/18:1(9Z)/20:4(5Z,8Z,11Z,14Z)); TG(18:1(9Z)/20:1(11Z)/20:4(5Z,8Z,11Z,14Z)); TG(18:1(9Z)/18:2(9Z,12Z)/20:4(5Z,8Z,11Z,14Z)); TG(18:1(9Z)/20:4(5Z,8Z,11Z,14Z)/20:4(5Z,8Z,11Z,14Z)); TG(18:2(9Z,12Z)/20:4(5Z,8Z,11Z,14Z)/20:4(5Z,8Z,11Z,14Z)) |
| Urea cycle and related diseases                | wiki   WP4571 | 0.00016 (36%)  | fumarate; Fumaric acid;Glutamate; L-Glutamic acid;L-Aspartic acid;ornithine;Glutamine; L-Glutamine                                                                                                                                                                                                                                                                                                                                                                                                                                 |
| Metabolic reprogramming in colon cancer        | wiki   WP4290 | 0.00016 (18%)  | Citric acid;fumarate; Fumaric acid;Glutamate; L-Glutamic acid;(S)-malate; Malic acid;L-Asparagine;D-threo-Isocitrate; Isocitric acid;Glutamine; L-Glutamine                                                                                                                                                                                                                                                                                                                                                                        |
| Urea cycle and metabolism of amino groups      | wiki   WP497  | 0.00091 (18%)  | fumarate; Fumaric acid;Glutamate; L-Glutamic acid;L-Aspartic acid;ornithine;Creatinine;Spermidine                                                                                                                                                                                                                                                                                                                                                                                                                                  |
| Arachidonic acid (AA, ARA) oxylipin metabolism | wiki   WP5155 | 0.000076 (13%) | all-cis-5,8,11,14-Eicosatetraenoic acid; Arachidonic acid;15-HETE; FA 20:4;O;5S,6R-LipoxinA4; Lipoxin A4;8-HETE;11(R)-HETE;12(S)-Leukotriene B4; 6t,12epi-LTB4;5,15-DiHETE; FA 20:4;O2;8,15-DiHETE; FA 20:4;O2;9-HETE;5-HETE                                                                                                                                                                                                                                                                                                       |
| Biomarkers for urea cycle disorders            | wiki   WP4583 | 0.00011 (27%)  | fumarate; Fumaric acid;Glutamate; L-Glutamic acid;L-Aspartic acid;ornithine;Glutamine; L-Glutamine;L-Methionine; Methionine                                                                                                                                                                                                                                                                                                                                                                                                        |

|                                                                           |                         |               |                                                                                                                                                                                                                                                            |
|---------------------------------------------------------------------------|-------------------------|---------------|------------------------------------------------------------------------------------------------------------------------------------------------------------------------------------------------------------------------------------------------------------|
| Amino acid metabolism                                                     | wiki   WP3925           | 0.00004 (11%) | cis-aconitate; cis-Aconitic acid;Citric acid;fumarate; Fumaric acid;Glutamate; L-Glutamic acid;(S)-malate; Malic acid;L-Asparagine;L-Aspartic acid;D-threo-Isocitrate; Isocitric acid;Ornithine;Glutamine; L-Glutamine;L-Methionine; Methionine;Spermidine |
| Hereditary leiomyomatosis and renal cell carcinoma pathway                | wiki   WP4206           | 0.00091 (24%) | Citric acid;fumarate; Fumaric acid;Glutamate; L-Glutamic acid;(S)-malate; Malic acid;D-threo-Isocitrate; Isocitric acid                                                                                                                                    |
| Amino acid metabolism pathway excerpt: histidine catabolism extension     | wiki   WP4661           | 0.00004 (35%) | cis-aconitate; cis-Aconitic acid;Citric acid;fumarate; Fumaric acid;Glutamate; L-Glutamic acid;(S)-malate; Malic acid;D-threo-Isocitrate; Isocitric acid                                                                                                   |
| Transport of bile salts and organic acids, metal ions and amine compounds | reactome   R-HSA-425366 | 0.05 (9%)     | Citric acid;L-Asparagine;Creatinine;Glutamine; L-Glutamine;L-Methionine; Methionine;Spermidine;SAL; Salicylic acid                                                                                                                                         |

**Supplemental Table E2: PNOIT: Biological pathways associated with OIT outcome matched to metabolites of interest.**

| Pathway Name                   | Pathway Source/Pathway ID | p-value (FDR adj) (% Matched Analytes) | Matched Analytes                                                                                                                                                                                                                                                                       |
|--------------------------------|---------------------------|----------------------------------------|----------------------------------------------------------------------------------------------------------------------------------------------------------------------------------------------------------------------------------------------------------------------------------------|
| Primary bile acid biosynthesis | kegg   map00120           | 0.017 (17%)                            | Glycine;Taurine;Adenosine triphosphate; ATP;Lithocholic acid glycine conjugate;Glycoursodeoxycholate; Glycoursodeoxycholic acid;Lithocholic acid; ST 24:1;O3;Tauroursodeoxycholic acid;Ursodeoxycholate; Ursodeoxycholic acid;ADP;CE(22:6(4Z,7Z,10Z,13Z,16Z,19Z));CE(20:3(8Z,11Z,14Z)) |



|                                                                           |                         |                 |                                                                                                                                                                                                                                       |
|---------------------------------------------------------------------------|-------------------------|-----------------|---------------------------------------------------------------------------------------------------------------------------------------------------------------------------------------------------------------------------------------|
| Transport of bile salts and organic acids, metal ions and amine compounds | reactome   R-HSA-425366 | 0.000054 (15%)  | Betaine;Choline;Glycine;L-Alanine;L-Proline;L-Threonine;L-Asparagine;L-Serine; Serine;Taurine;succinate; Succinic acid; Wormwood acid;Arginine; L-Arginine;Spermidine                                                                 |
| Recycling of bile acids and salts                                         | reactome   R-HSA-159418 | 0.0000002 (45%) | Adenosine monophosphate; AMP;Glycine;Taurine;Adenosine triphosphate; ATP;Glycoursodeoxycholate; Glycoursodeoxycholic acid;Lithocholic acid; ST 24:1;O3;Tauroursodeoxycholic acid;Ursodeoxycholate; Ursodeoxycholic acid;ADP           |
| Synthesis of bile acids and bile salts                                    | reactome   R-HSA-193368 | 0.00019 (18%)   | Adenosine monophosphate; AMP;Glycine;Taurine;Adenosine triphosphate; ATP;Glycoursodeoxycholate; Glycoursodeoxycholic acid;Lithocholic acid; ST 24:1;O3;Tauroursodeoxycholic acid;Ursodeoxycholate; Ursodeoxycholic acid;ADP           |
| Histidine catabolism                                                      | wiki   WP4988           | 0.015 (14%)     | Urocanic acid;Adenosine triphosphate; ATP;ADP                                                                                                                                                                                         |
| Sphingolipid metabolism                                                   | wiki   WP2788           | 0.0037 (9%)     | L-Serine; Serine;Adenosine triphosphate; ATP;ADP;Phosphorylcholine;DG(16:0_16:0); DG(18:0/20:4(5Z,8Z,11Z,14Z)/0:0);ceramide phosphocholine (sphingomyelin, SM); N-lauroyl-D-erythro-Sphingosylphosphoryl choline; SM(d18:1/24:1(15Z)) |
| Eicosanoid metabolism via lipoxygenases (LOX)                             | wiki   WP4721           | 0.03 (9%)       | 5S,6R-LipoxinA4; Lipoxin A4;12(S)-Leukotriene B4; 6t,12epi-LTB4;5-HETE                                                                                                                                                                |
